# Supplementary material
Source: publisher site journal article supplement (https://www.dovepress.com/article/371042)
Supplement: Supplementary file 1 [file get_supplementary_file.php]

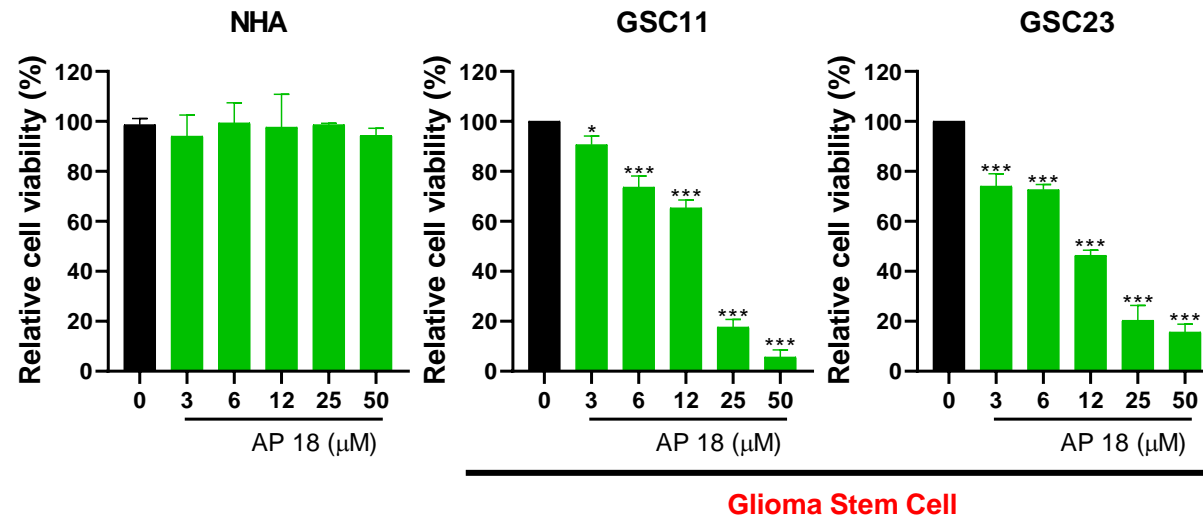

**Supplementary Figure 1. AP 18 inhibits the viability of GSCs without serum.** Cell viability analysis of GSC11, GSC23, and normal human astrocytes (NHA) after treatment with or without 7β-22 dihydroxyhopane (AP 18) at the indicated concentrations for 48 hrs in serum-free medium. \*  $P < 0.05$ , \*\*\*  $P < 0.001$ . Results were obtained from six independent experiments and represent the mean  $\pm$  SEM.

**NHA – AP18, 0 hr**

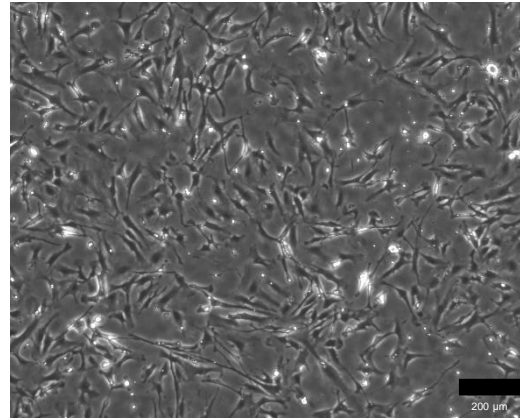

**NHA – AP18, 72 hr**

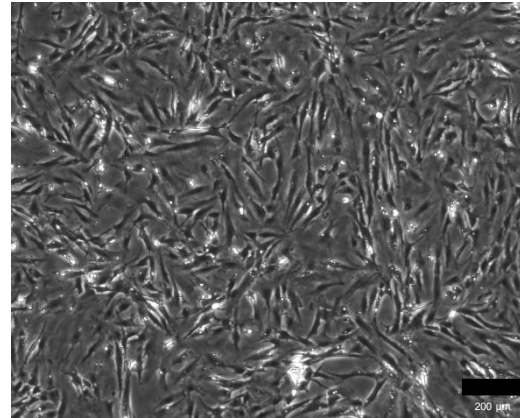

**Supplementary Figure 2. Cell confluence analysis after AP18 treatment to NHA.** Confluence of NHA treated with AP 18 (14  $\mu$ M) or DMSO (mock) for 72 hrs.

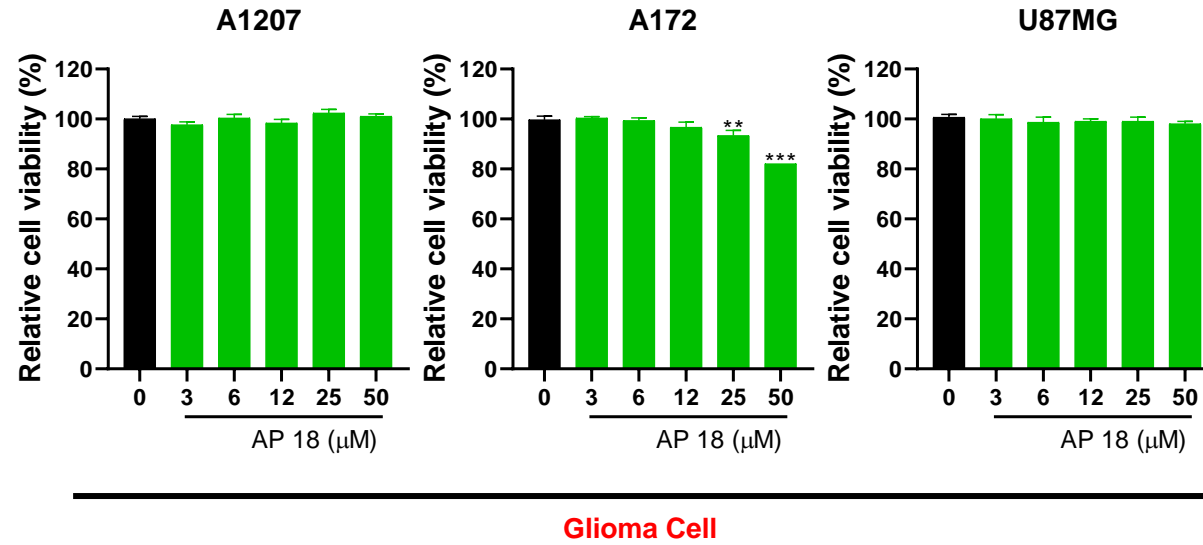

**Supplementary Figure 3. Cell viability analysis of glioma cell lines after AP18 treatment.** Cell viability analysis of A12078, A172, and normal U87MG after treatment with or without 7β-22 dihydroxyhopane (AP 18) at the indicated concentrations for 48 hrs in serum-free medium. \*\* $P < 0.01$ , \*\*\* $P < 0.001$ . Results were obtained from six independent experiments and represent the mean  $\pm$  SEM.
